# Supplementary material for: Synthesis of Oil Miscible Novel Silane Functionalised Imidazoline-Based ILs as Lubricant Additives: Characterization and Tribological Evaluations
Source: Springer Nature journal article supplement (doi:10.1007/s11249-022-01567-6), 2022-02-08

**Figure SI 1 SBO**

| Element | Weight% | Atomic% |
| --- | --- | --- |
|  |  |  |
| C K | 10.34 | 34.24 |
| O K | 1.01 | 2.51 |
| Si K | 0.18 | 0.25 |
| Fe K | 88.47 | 62.99 |
|  |  |  |
| Totals | 100.00 |  |


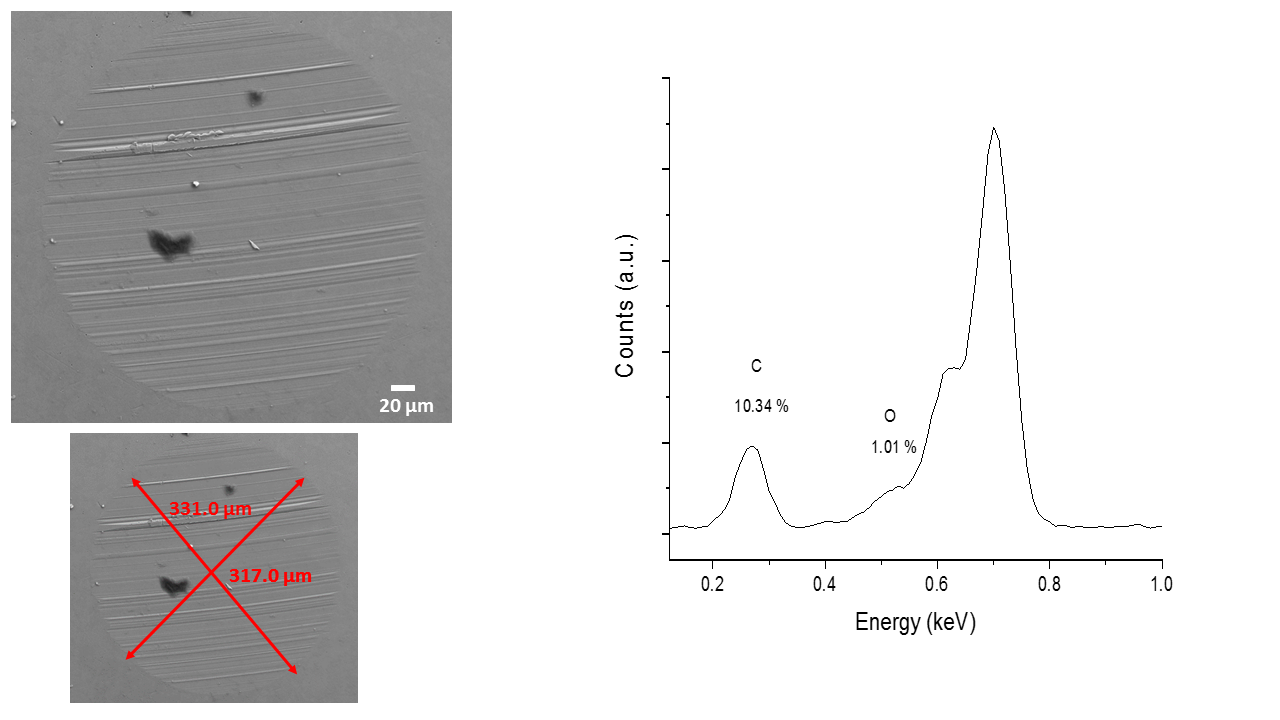


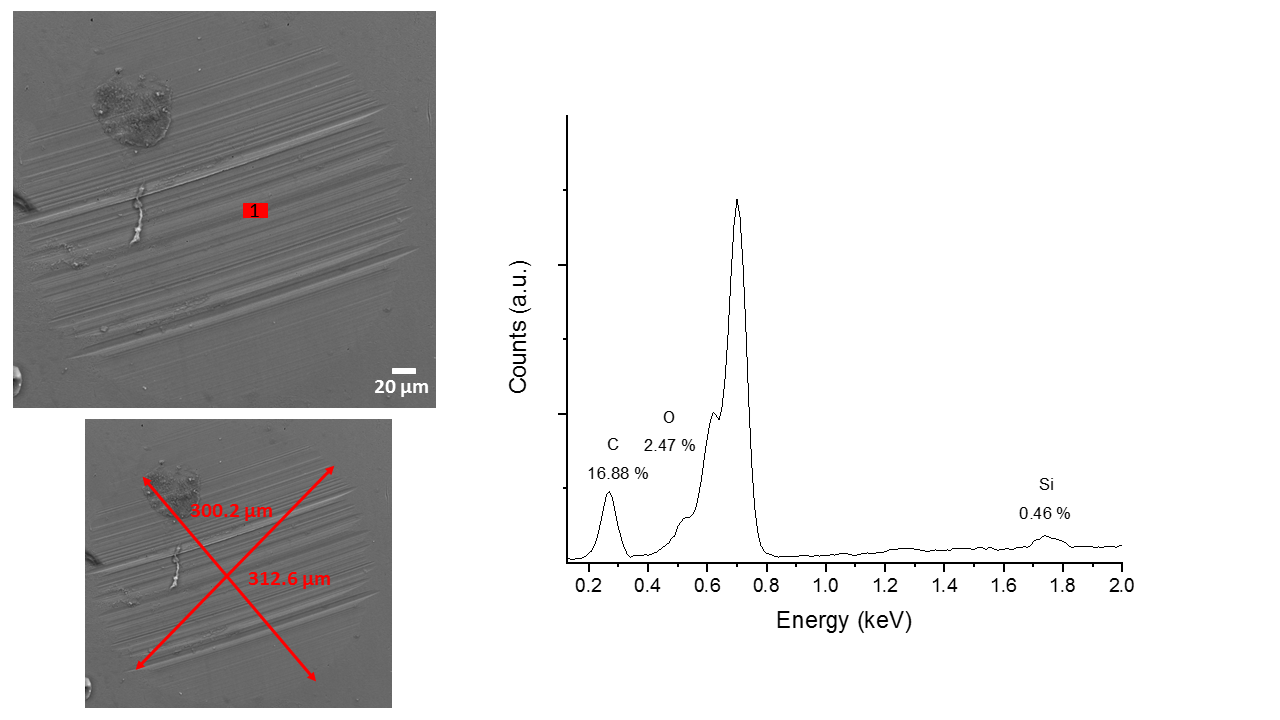


| Element | Weight% | Atomic% |
| --- | --- | --- |
|  |  |  |
| C K | 16.08 | 46.05 |
| O K | 1.40 | 3.00 |
| Si K | 0.20 | 0.25 |
| Fe K | 82.32 | 50.70 |
|  |  |  |
| Totals | 100.00 |  |

**Figure SI-2 TPEIPS BEHP (neat)**

**Figure SI-3 BEHP (neat)**


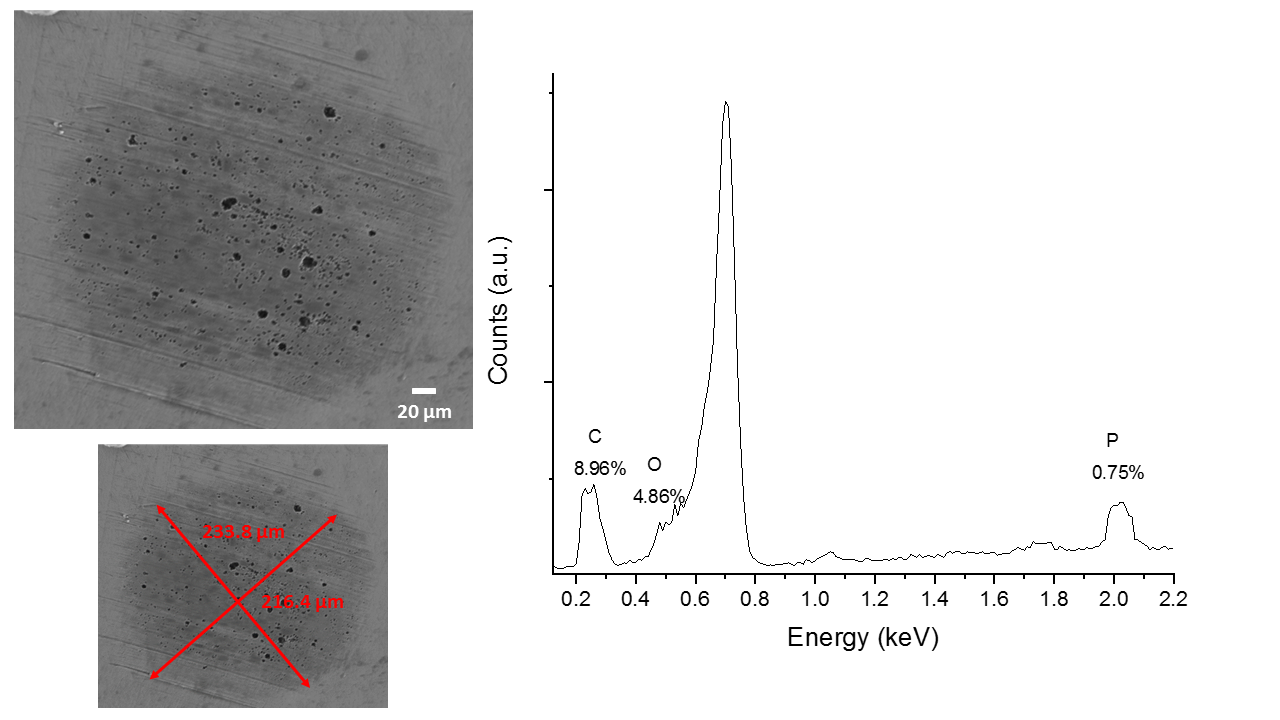


| Element | Weight% | Atomic% |
| --- | --- | --- |
|  |  |  |
| C K | 8.96 | 28.66 |
| O K | 4.86 | 11.67 |
| P K | 0.75 | 0.93 |
| Fe K | 85.42 | 58.74 |
|  |  |  |
| Totals | 100.00 |  |

**Figure SI 4 EDS of steel ball outside the wear scar**

| Element | Weight% | Atomic% |
| --- | --- | --- |
|  |  |  |
| C K | 11.52 | 37.05 |
| O K | 0.90 | 2.18 |
| Si K | 0.16 | 0.22 |
| Cr K | 1.43 | 1.06 |
| Fe K | 85.99 | 59.49 |
|  |  |  |
| Totals | 100.00 |  |

**Figure SI 5 Dynamic Viscosity at different shear rate w.r.t temperature**

| **Lubricant** | **Temperature** | **Dynamic Viscosity**  **(Pa.s)** | **Standard Deviation** |
| --- | --- | --- | --- |
| **Base oil** | 30◦C | 0.0426655 | 0.00007 |
| **1% TPEIPS EHA SBO** | 30◦C | 0.042841 | 0.00004 |
| **1% TPEIPS BEHP SBO** | 30◦C | 0.44828 | 0.00003 |
| **Base oil** | 40◦C | 0.027928 | 0.00009 |
| **1% TPEIPS EHA SBO** | 40◦C | 0.02855 | 0.00007 |
| **1% TPEIPS BEHP SBO** | 40◦C | 0.02829 | 0.00013 |
| **Base oil** | 50◦C | 0.01917 | 0.00002 |
| **1% TPEIPS EHA SBO** | 50◦C | 0.01969 | 0.00007 |
| **1% TPEIPS BEHP SBO** | 50◦C | 0.01959 | 0.00004 |
| **Base oil** | 60◦C | 0.013862 | 0.00007 |
| **1% TPEIPS EHA SBO** | 60◦C | 0.014261 | 0.00002 |
| **1% TPEIPS BEHP SBO** | 60◦C | 0.014146 | 0.00002 |

**Figure SI 6 SRV test of 5wt% MoDTC in Base oil Vs Base oil (200 N)**

**Figure SI 7: 1H NMR of TPEIPS EHA**


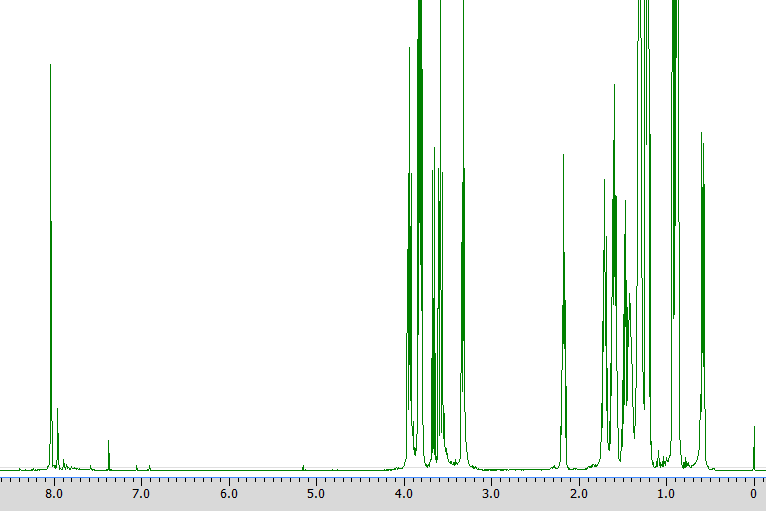


**13C NMR of TPEIPS EHA**


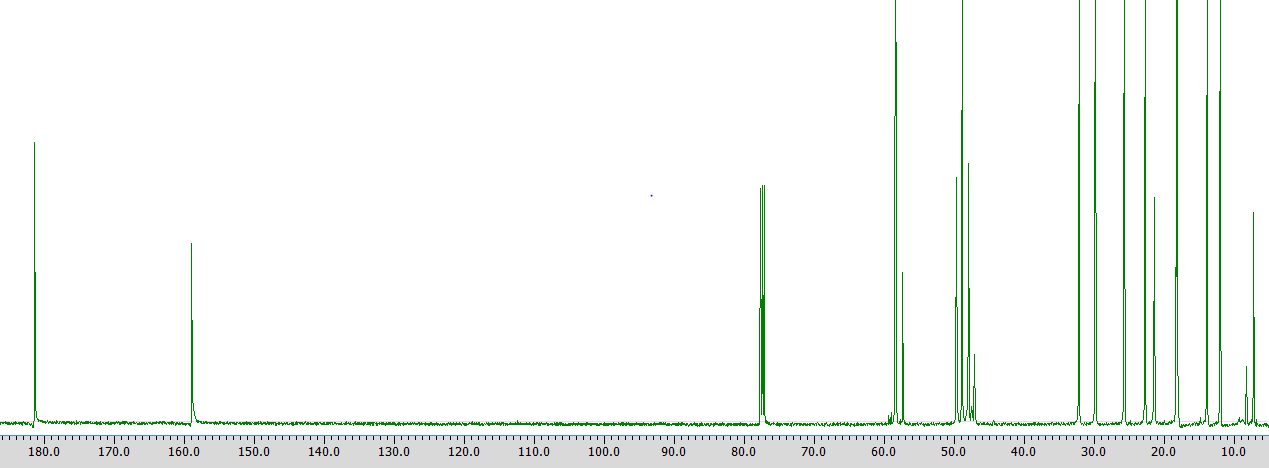


**Figure SI 8: 1H NMR of TPEIPS BEHP**


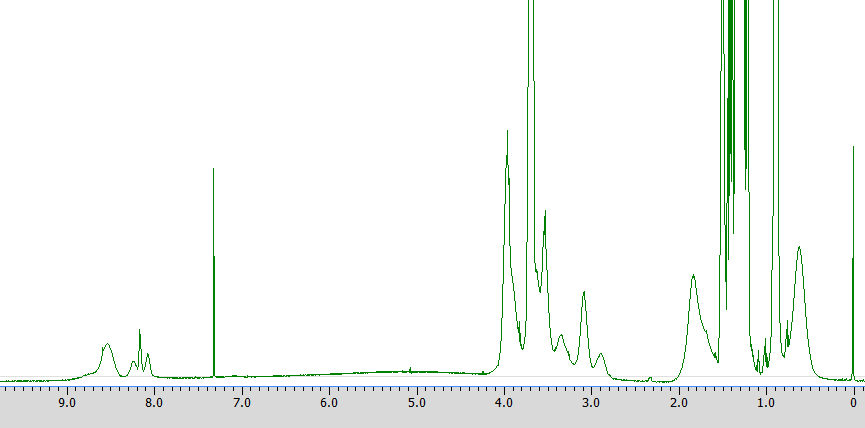


**13C NMR of TPEIPS BEHP**


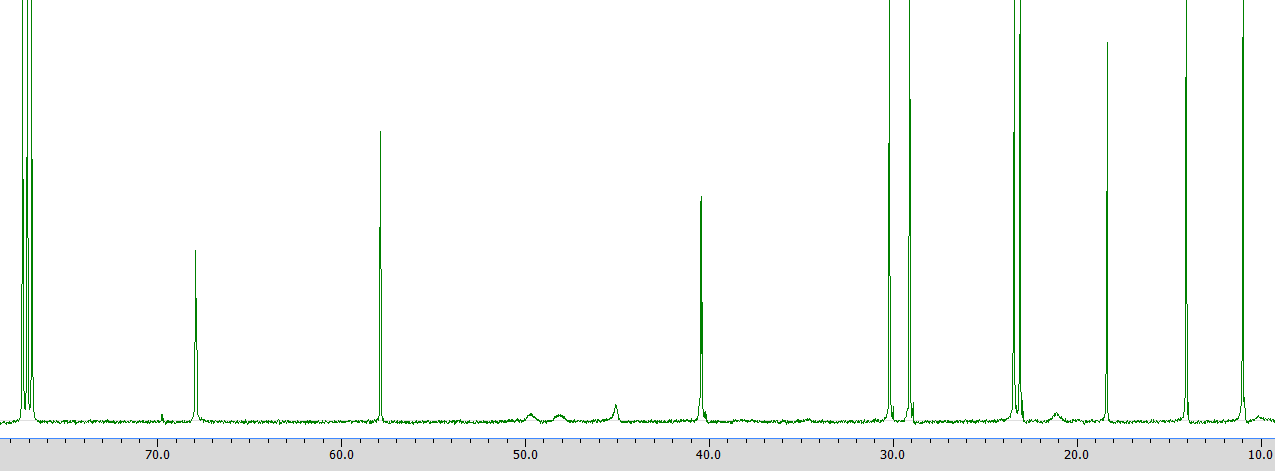

Supplement: MOESM1 [file 20115984]
